# Supplementary material for: One-step synthesis of 1-halo-1,3-butadienes via ruthenium-catalysed hydrohalogenative dimerisation of alkynes
Source: Royal Society of Chemistry journal article supplement (doi:10.1039/c2cc36422k), 2012-01-01

# One-Step Synthesis of 1-Halo-1,3-butadienes via Ruthenium-Catalysed Hydrohalogenative Dimerisation of Alkynes

Hubert Klein, Thierry Roisnel, Christian Bruneau\* and Sylvie Dérien\*

## Supporting Information for Publication

### Table of contents

|                                                                                                     |    |
|-----------------------------------------------------------------------------------------------------|----|
| General information                                                                                 | P1 |
| General procedure for the catalytic preparation of chlorinated dienes with HCl                      | P2 |
| General procedure for the catalytic preparation of halogenated dienes with CSA/BnEt <sub>3</sub> NX | P2 |
| General procedure for the synthesis of diene 4a <i>via</i> Suzuki-Miyaura reaction                  | P2 |
| Spectroscopic data for compounds <b>2-4</b>                                                         | P3 |
| Structural data for (1 <i>Z</i> , 3 <i>E</i> )- <b>2a</b> and (1 <i>E</i> , 3 <i>E</i> )- <b>2i</b> | P8 |

### General information

All catalytic reactions were carried out under inert atmosphere in Schlenk tubes. The complex RuCl(C<sub>5</sub>Me<sub>5</sub>)(cod) was prepared according to the reported method.<sup>1</sup> <sup>1</sup>H, <sup>19</sup>F and <sup>13</sup>C NMR spectra were recorded on Bruker 400 and 500 MHz spectrometers in deuterated chloroform or deuterated benzene solutions at 298 K. Mass spectra were obtained on Waters Q-Tof 2 high-resolution spectrometer in Centre Regional de Mesures de l'Ouest (CRMPO) of the University of Rennes 1. X-Ray crystallographic analysis was performed with an APEXII, Bruker-AXS diffractometer using Mo K $\alpha$  radiation ( $\lambda$ = 0.71073 Å). The compounds were characterized by <sup>1</sup>H and <sup>13</sup>C NMR techniques including COSY, HMQC, HMBC and NOESY experiments.

<sup>1</sup> P. J. Fagan, W. S. Mahoney, J. C. Calabrese, I. D. Williams, *Organometallics*, 1990, **9**, 1843.

### **General procedure for the catalytic preparation of chlorinated dienes with HCl.**

In a Schlenk tube under inert atmosphere, to a solution of 1,2-dichloroethane (0.5 mL) containing 0.05 mol of the precatalyst  $\text{RuCl}(\text{C}_5\text{Me}_5)(\text{cod})$  was added 1 mmol of the alkyne and 0.5 equiv of 2N HCl (in diethyl ether). The mixture was stirred at room temperature for 2 to 40 h. Reaction completion was monitored using GC or TLC techniques. The solvent was removed under vacuum and chlorinated dienes were separated as pure compounds using standard chromatography over silica gel.

### **General procedure for the catalytic preparation of halogenated dienes with CSA/ $\text{BnEt}_3\text{NX}$ .**

In a Schlenk tube under inert atmosphere, to a solution of 1,2-dichloroethane (0.5 mL) containing 0.05 mol of the precatalyst  $\text{RuCl}(\text{C}_5\text{Me}_5)(\text{cod})$ , 0.5 mmol of CSA and 0.5 or 1.0 equiv of  $\text{BnEt}_3\text{NCl}$  or  $\text{BnEt}_3\text{NBr}$  was added 1 mmol of the alkyne. The mixture was stirred at room temperature for 2 to 19 h. Reaction completion was monitored using GC or TLC techniques. The solvent was removed under vacuum and halogenated dienes were separated as pure compounds using standard chromatography over silica gel.

### **General procedure for the synthesis of diene **4a** via Suzuki-Miyaura reaction.**

In a Schlenk tube under inert atmosphere containing the chlorodiene **1a** (77 mg, 0.32 mmol) and  $\text{Pd}(\text{OAc})_2$  (1.4 mg, 0.006 mmol) were added xylene (1.0 mL) and  $\text{PCy}_3$  (20% in toluene, 23  $\mu\text{L}$ , 0.015 mmol). The mixture was stirred at room temperature before to add phenylboronic acid (55 mg, 0.45 mmol) and  $\text{K}_2\text{CO}_3$  (124 mg, 0.90 mmol). Then, the mixture was stirred at 80 °C for 18 h. After cooling, the solvent was removed under vacuum and the diene **4a** was purifying using standard chromatography over silica gel.

## Spectroscopic data for compounds 2-4

(1Z, 3E)-1-chloro-1,4-diphenylbuta-1,3-diene **2a**<sup>2</sup>

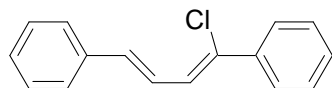

Chromatography on silica gel using pentane/dichloromethane (90/10) as eluting mixture afforded compound **2a** as white solid, identified by NMR spectra according to the reported data. <sup>1</sup>H NMR (500 MHz, CDCl<sub>3</sub>)  $\delta$  ppm: 7.71 (d, 2H,  $J$  = 8.4 Hz, Ar); 7.53 (d, 2H,  $J$  = 8.0 Hz, Ar); 7.42-7.34 (m, 6H, Ar + =CH); 7.32-7.294 (m, 1H, Ar); 6.96 (d, 1H,  $J$  = 10.4 Hz, =CH); 6.82 (d, 1H,  $J$  = 15.7 Hz, =CH). <sup>1</sup>H NMR (400 MHz, C<sub>6</sub>D<sub>6</sub>)  $\delta$  ppm: 7.57 (d, 2H,  $J$  = 7.8 Hz, Ar); 7.47 (dd, 1H,  $J$  = 15.7 Hz,  $J$  = 10.4 Hz, =CH); 7.29 (d, 2H,  $J$  = 7.2 Hz, Ar); 7.10-7.01 (m, 6H, Ar); 6.68 (d, 1H,  $J$  = 10.4 Hz, =CH); 6.50 (d, 1H,  $J$  = 15.7 Hz, =CH). <sup>13</sup>C NMR (125 MHz, CDCl<sub>3</sub>)  $\delta$  ppm: 137.7, 137.0, 135.7, 132.8, 128.7, 128.6, 128.4, 128.2, 126.8, 126.2, 125.9, 125.0. HRMS calcd for [M+H]<sup>+</sup> C<sub>16</sub>H<sub>14</sub><sup>35</sup>Cl 241.0784, found: 241.0785.

(1Z, 3E)-1-chloro-1,4-di(4-methylphenyl)buta-1,3-diene **2b**

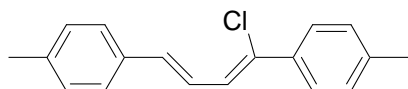

Chromatography on silica gel using pentane/diethyl ether (90/10) as eluting mixture afforded compound **2b** as white solid. <sup>1</sup>H NMR (400 MHz, CDCl<sub>3</sub>)  $\delta$  ppm: 7.60 (d, 2H,  $J$  = 8.2 Hz, Ar); 7.42 (d, 2H,  $J$  = 8.0 Hz, Ar); 7.33 (dd, 1H,  $J$  = 15.7 Hz,  $J$  = 10.4 Hz, =CH); 7.21 (d, 2H,  $J$  = 8.5 Hz, Ar); 7.19 (d, 2H,  $J$  = 8.3 Hz, Ar); 6.92 (d, 1H,  $J$  = 10.4 Hz, =CH); 6.77 (d, 1H,  $J$  = 15.7 Hz, =CH); 2.40 (s, 3H, CH<sub>3</sub>); 2.39 (s, 3H, CH<sub>3</sub>). <sup>13</sup>C NMR (100 MHz, CDCl<sub>3</sub>)  $\delta$  ppm: 138.6, 138.1, 135.2, 135.0, 134.4, 132.4, 129.4, 129.1, 126.7, 126.1, 125.2, 124.2, 21.3, 21.1. HRMS calcd for [M+H]<sup>+</sup> C<sub>18</sub>H<sub>18</sub><sup>35</sup>Cl 269.1097, found: 269.1095.

<sup>2</sup> T. Iwai, T. Fujihara, J. Terao, Y. Tsuji, *J. Am. Chem. Soc.*, 2009, **131**, 6668.

(1Z, 3E)-1-chloro-1,4-di(4-tert-butylphenyl)buta-1,3-diene **2c**

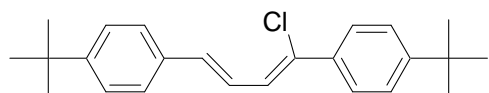

Chromatography on silica gel using pentane as eluent afforded compound **2c** as pale yellow solid.  $^1\text{H}$  NMR (400 MHz,  $\text{CDCl}_3$ )  $\delta$  ppm: 7.65 (d, 2H,  $J = 8.7$  Hz, Ar); 7.47 (d, 2H,  $J = 8.4$  Hz, Ar); 7.43 (d, 2H,  $J = 8.9$  Hz, Ar); 7.41 (d, 2H,  $J = 8.8$  Hz, Ar); 7.35 (dd, 1H,  $J = 15.7$  Hz,  $J = 10.4$  Hz, =CH); 6.95 (d, 1H,  $J = 10.4$  Hz, =CH); 6.80 (d, 1H,  $J = 15.7$  Hz, =CH); 1.39 (s, 9H, *t*-Bu); 1.37 (s, 9H, *t*-Bu).  $^{13}\text{C}$  NMR (100 MHz,  $\text{CDCl}_3$ )  $\delta$  ppm: 151.8, 151.3, 135.1, 135.0, 134.4, 132.4, 126.5, 125.9, 125.6, 125.4, 125.3, 124.5, 34.7, 34.6, 31.2, 31.2. HRMS calcd for  $[\text{M}]^+ \text{C}_{24}\text{H}_{29}^{35}\text{Cl}$  352.1958, found: 352.1962.

(1Z, 3E)-1-chloro-1,4-di(4-methoxyphenyl)buta-1,3-diene **2d**

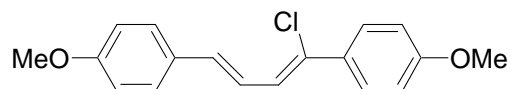

Chromatography on silica gel using pentane/diethyl ether (85/15) as eluting mixture afforded compound **2d** as yellow solid.  $^1\text{H}$  NMR (400 MHz,  $\text{CDCl}_3$ )  $\delta$  ppm: 7.61 (d, 2H,  $J = 8.9$  Hz, Ar); 7.44 (d, 2H,  $J = 8.7$  Hz, Ar); 7.19 (dd, 1H,  $J = 15.6$  Hz,  $J = 10.3$  Hz, =CH); 6.90 (d, 2H,  $J = 8.9$  Hz, Ar); 6.891 (d, 2H,  $J = 8.8$  Hz, Ar); 6.81 (d, 1H,  $J = 10.3$  Hz, =CH); 6.71 (d, 1H,  $J = 15.6$  Hz, =CH); 3.84 (s, 3H,  $\text{OCH}_3$ ); 3.83 (s, 3H,  $\text{OCH}_3$ ).  $^{13}\text{C}$  NMR (100 MHz,  $\text{CDCl}_3$ )  $\delta$  ppm: 159.9, 159.6, 134.3, 131.5, 130.6, 130.1, 128.0, 127.5, 124.5, 123.2, 114.2, 113.8, 55.4, 55.3. HRMS calcd for  $[\text{M}]^+ \text{C}_{18}\text{H}_{17}\text{O}_2^{35}\text{Cl}$  300.0917, found: 300.0905.

(1Z, 3E)-1-chloro-1,4-di(4-fluorophenyl)buta-1,3-diene **2e**

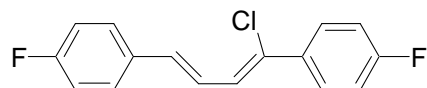

Chromatography on silica gel using pentane/diethyl ether (95/5) as eluting mixture afforded compound **2e** as pale yellow solid.  $^{19}\text{F}$  NMR (376 MHz,  $\text{CDCl}_3$ )  $\delta$  ppm: - 112.6 (m); - 113.0 (m).  $^1\text{H}$  NMR (400 MHz,  $\text{CDCl}_3$ )  $\delta$  ppm: 7.65 (dd, 2H,  $J = 9.0$  Hz,  $J = 5.2$  Hz, Ar); 7.47 (dd, 2H,  $J = 8.7$  Hz,  $J = 5.4$  Hz, Ar); 7.22 (dd, 1H,  $J = 15.7$  Hz,  $J = 10.3$  Hz, =CH); 7.09-7.03 (m,

4H, Ar); 6.84 (d, 1H,  $J = 10.3$  Hz, =CH); 6.75 (d, 1H,  $J = 15.7$  Hz, =CH).  $^{13}\text{C}$  NMR (100 MHz,  $\text{CDCl}_3$ )  $\delta$  ppm: 162.9 (d,  $J = 249.5$  Hz), 162.7 (d,  $J = 248.5$  Hz), 134.4, 133.9 (d,  $J = 3.5$  Hz), 133.2 (d,  $J = 3.2$  Hz), 131.7, 128.3 (d,  $J = 8.1$  Hz), 128.1 (d,  $J = 8.2$  Hz), 125.6 (m), 124.6 (d,  $J = 2.4$  Hz), 115.8 (d,  $J = 21.8$  Hz), 115.4 (d,  $J = 21.9$  Hz). HRMS calcd for  $[\text{M}]^+$   $\text{C}_{16}\text{H}_{11}\text{F}_2^{35}\text{Cl}$  276.0517, found: 276.0518.

(1Z, 3E)-1-chloro-1,4-di(4-bromophenyl)buta-1,3-diene **2f**

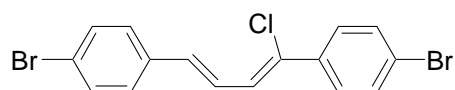

Chromatography on silica gel using pentane/diethyl ether (90/10) as eluting mixture afforded compound **2f** as pale yellow solid.  $^1\text{H}$  NMR (400 MHz,  $\text{CDCl}_3$ )  $\delta$  ppm: 7.54 (d, 2H,  $J = 9.0$  Hz, Ar); 7.50 (d, 2H,  $J = 9.0$  Hz, Ar); 7.47 (d, 2H,  $J = 8.5$  Hz, Ar); 7.36 (d, 2H,  $J = 8.5$  Hz, Ar); 7.29 (dd, 1H,  $J = 15.7$  Hz,  $J = 10.4$  Hz, =CH); 6.90 (d, 1H,  $J = 10.4$  Hz, =CH); 6.73 (d, 1H,  $J = 15.7$  Hz, =CH).  $^{13}\text{C}$  NMR (100 MHz,  $\text{CDCl}_3$ )  $\delta$  ppm: 136.5, 135.8, 134.8, 132.3, 131.9, 131.6, 128.2, 127.7, 126.0, 125.4, 122.9, 122.2. HRMS calcd for  $[\text{M}]^+$   $\text{C}_{16}\text{H}_{11}^{35}\text{Cl}^{79}\text{Br}_2$  395.8916, found: 395.8911.

(1Z, 3E)-1-chloro-1,4-di(4-trifluoromethylphenyl)buta-1,3-diene **2g**

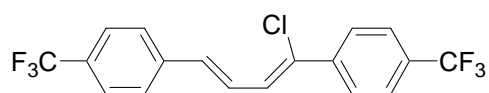

Chromatography on silica gel using pentane/diethyl ether (90/10) as eluting mixture afforded compound **2g** as pale yellow solid.  $^{19}\text{F}$  NMR (376 MHz,  $\text{CDCl}_3$ )  $\delta$  ppm: - 62.6; - 62.7.  $^1\text{H}$  NMR (400 MHz,  $\text{CDCl}_3$ )  $\delta$  ppm: 7.79 (d, 2H,  $J = 8.3$  Hz, Ar); 7.65 (d, 2H,  $J = 8.4$  Hz, Ar); 7.64-7.58 (m, 4H, Ar); 7.41 (dd, 1H,  $J = 15.7$  Hz,  $J = 10.4$  Hz, =CH); 7.02 (d, 1H,  $J = 10.4$  Hz, =CH); 6.87 (d, 1H,  $J = 15.7$  Hz, =CH).  $^{13}\text{C}$  NMR (100 MHz,  $\text{CDCl}_3$ )  $\delta$  ppm: 140.8, 140.1, 135.2, 132.8, 130.7 (q,  $J = 32.7$  Hz), 130.1 (q,  $J = 32.7$  Hz), 127.2, 127.0, 126.8, 126.6, 125.7 (q,  $J = 3.8$  Hz), 125.5 (q,  $J = 3.8$  Hz), 124.1 (q,  $J = 272.0$  Hz), 123.9 (q,  $J = 272.0$  Hz). HRMS calcd for  $[\text{M}]^+$   $\text{C}_{18}\text{H}_{11}\text{F}_6^{35}\text{Cl}$  376.0454, found: 376.0450.

(1Z, 3E)-1-chloro-1,4-di(4-acylphenyl)buta-1,3-diene **2h**

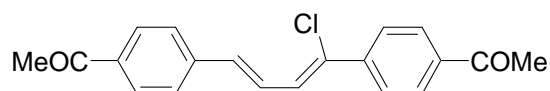

Chromatography on silica gel using pentane/dichloromethane/ethylacetate (50/40/10) as eluting mixture afforded compound **2h** as yellow solid.  $^1\text{H}$  NMR (400 MHz,  $\text{CDCl}_3$ )  $\delta$  ppm: 7.97 (d, 2H,  $J = 8.6$  Hz, Ar); 7.94 (d, 2H,  $J = 8.3$  Hz, Ar); 7.78 (d, 2H,  $J = 8.6$  Hz, Ar); 7.58 (d, 2H,  $J = 8.4$  Hz, Ar); 7.45 (dd, 1H,  $J = 15.7$  Hz,  $J = 10.4$  Hz, =CH); 7.06 (d, 1H,  $J = 10.4$  Hz, =CH); 6.88 (d, 1H,  $J = 15.7$  Hz, =CH); 2.62 (s, 3H,  $\text{CH}_3$ ); 2.60 (s, 3H,  $\text{CH}_3$ ).  $^{13}\text{C}$  NMR (100 MHz,  $\text{CDCl}_3$ )  $\delta$  ppm: 197.3, 197.2, 141.5, 141.2, 137.0, 136.6, 135.7, 133.3, 128.9, 128.5, 127.4, 127.2, 126.9, 126.4, 26.6, 26.5. HRMS calcd for  $[\text{M}+\text{H}]^+$   $\text{C}_{20}\text{H}_{18}\text{O}_2^{35}\text{Cl}$  325.0995, found: 325.0995.

(1Z, 3E) and (1E, 3E) -1-chloro-1,4-di(4-cyanophenyl)buta-1,3-diene **2i**

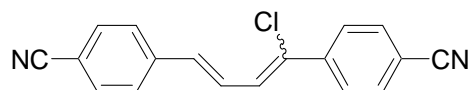

Chromatography on silica gel using pentane/dichloromethane/ethylacetate (65/30/5) as eluting mixture afforded compound (1E,3E)-**2i** as pale yellow solid and pentane/dichloromethane/ethylacetate (60/30/10) as eluting mixture afforded compound (1Z, 3E)-**2i** as yellow solid.

(1Z, 3E) -1-chloro-1,4-di(4-cyanophenyl)buta-1,3-diene :  $^1\text{H}$  NMR (400 MHz,  $\text{CDCl}_3$ )  $\delta$  ppm: 7.79 (d, 2H,  $J = 8.5$  Hz, Ar); 7.68 (d, 2H,  $J = 8.5$  Hz, Ar); 7.65 (d, 2H,  $J = 8.4$  Hz, Ar); 7.59 (d, 2H,  $J = 8.4$  Hz, Ar); 7.43 (dd, 1H,  $J = 15.7$  Hz,  $J = 10.4$  Hz, =CH); 7.05 (d, 1H,  $J = 10.4$  Hz, =CH); 6.86 (d, 1H,  $J = 15.7$  Hz, =CH).  $^{13}\text{C}$  NMR (100 MHz,  $\text{CDCl}_3$ )  $\delta$  ppm: 141.3, 140.9, 135.4, 133.1, 132.6, 132.3, 127.8, 127.7, 127.3, 126.8, 118.7, 118.3, 112.4, 111.7. HRMS calcd for  $[\text{M}+\text{H}]^+$   $\text{C}_{18}\text{H}_{12}\text{N}_2^{35}\text{Cl}$  291.0689, found: 291.0684.

(1E, 3E) -1-chloro-1,4-di(4-cyanophenyl)buta-1,3-diene :  $^1\text{H}$  NMR (400 MHz,  $\text{CDCl}_3$ )  $\delta$  ppm: 7.74 (d, 2H,  $J = 8.4$  Hz, Ar); 7.60 (d, 2H,  $J = 8.4$  Hz, Ar); 7.57 (d, 2H,  $J = 8.4$  Hz, Ar); 7.39 (d, 2H,  $J = 8.4$  Hz, Ar); 6.84-6.68 (m, 3H, =CH).  $^1\text{H}$  NMR (400 MHz,  $\text{C}_6\text{D}_6$ )  $\delta$  ppm: 7.39-7.36 (m, 2H, Ar); 7.20 (d, 2H,  $J = 8.3$  Hz, Ar); 7.16-7.12 (m, 2H, Ar); 6.88 (d, 2H,  $J = 8.3$  Hz, Ar); 6.67 (d, 1H,  $J = 11.3$  Hz, =CH); 6.60 (dd, 1H,  $J = 14.9$  Hz,  $J = 11.3$  Hz, =CH); 6.22 (d, 1H,  $J = 14.9$  Hz, =CH).  $^{13}\text{C}$  NMR (100 MHz,  $\text{CDCl}_3$ )  $\delta$  ppm: 141.2, 140.7, 133.8, 133.1,

132.5, 132.3, 130.7, 129.9, 127.0, 126.4, 118.6, 118.1, 113.0, 111.4. HRMS calcd for  $[M+Na]^+$   $C_{18}H_{11}N_2^{35}ClNa$  313.0509, found: 313.0511.

(1Z, 3E)-1-chloro-1,4-di(2-cyanophenyl)buta-1,3-diene **2j**

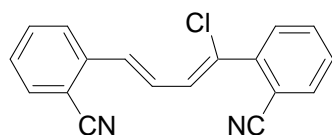

Chromatography on silica gel using pentane/diethyl ether/dichloromethane (65/5/30) as eluting mixture afforded compound **2j** as yellow solid.  $^1H$  NMR (400 MHz,  $CDCl_3$ )  $\delta$  ppm: 7.83 (d, 1H,  $J = 8.1$  Hz, Ar); 7.73 (d, 1H,  $J = 7.8$  Hz, Ar); 7.67-7.58 (m, 4H, Ar); 7.49-7.47 (m, 1H, Ar); 7.45-7.44 (m, 1H, =CH); 7.38-7.36 (m, 1H, Ar); 7.19 (d, 1H,  $J = 15.7$  Hz, =CH); 6.94 (d, 1H,  $J = 10.3$  Hz, =CH).  $^{13}C$  NMR (100 MHz,  $CDCl_3$ )  $\delta$  ppm: 141.8, 139.5, 133.8, 133.2, 132.8, 132.7, 132.5, 130.9, 130.6, 129.7, 129.2, 128.5, 128.0, 125.7, 117.6, 111.5, 110.9. HRMS calcd for  $[M+H]^+$   $C_{18}H_{12}N_2^{35}Cl$  291.0689, found: 291.0680.

(1Z, 3E)-1-bromo-1,4-diphenylbuta-1,3-diene **3a**<sup>3</sup>

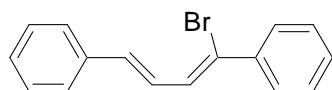

Chromatography on silica gel using pentane/dichloromethane (90/10) as eluting mixture afforded compound **3a** as white solid, identified by NMR spectra according to the reported data.  $^1H$  NMR (400 MHz,  $CDCl_3$ )  $\delta$  ppm: 7.66 (d, 2H,  $J = 7.3$  Hz, Ar); 7.53 (d, 2H,  $J = 7.4$  Hz, Ar); 7.40-7.29 (m, 7H, Ar + =CH); 7.02 (d, 1H,  $J = 10.2$  Hz, =CH); 6.86 (d, 1H,  $J = 15.6$  Hz, =CH).  $^{13}C$  NMR (100 MHz,  $CDCl_3$ )  $\delta$  ppm: 139.4, 136.9, 136.3, 129.4, 128.7, 128.7, 128.4, 128.3, 127.5, 126.8, 125.8. HRMS calcd for  $[M]^+$   $C_{16}H_{13}^{79}Br$  284.0201, found: 284.0211.

<sup>3</sup> H. J. Reich, I. L. Reich, *J. Org. Chem.*, 1975, **40**, 2248.

(3*E*)-1,1,4-triphenylbuta-1,3-diene **4a**<sup>4</sup>

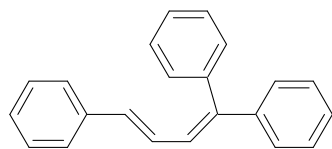

Chromatography on silica gel using pentane/dichloromethane (90/10) as eluting mixture afforded compound **4a** as white solid, identified by NMR spectra according to the reported data. <sup>1</sup>H NMR (400 MHz, CDCl<sub>3</sub>)  $\delta$  ppm: 7.47-7.37 (m, 3H, Ar); 7.34-7.25 (m, 11H, Ar); 7.22-7.19 (m, 1H, Ar); 6.95-6.88 (m, 2H, =CH); 6.80-6.72 (m, 1H, =CH). <sup>1</sup>H NMR (400 MHz, C<sub>6</sub>D<sub>6</sub>)  $\delta$  ppm: 7.34-7.32 (m, 2H, Ar); 7.26-7.24 (m, 2H, Ar); 7.18-7.07 (m, 8H, Ar + =CH); 7.05-6.94 (m, 4H, Ar); 6.86 (d, 1H, *J* = 11.1 Hz, =CH); 6.62 (d, 1H, *J* = 15.5 Hz, =CH). <sup>13</sup>C NMR (100 MHz, CDCl<sub>3</sub>)  $\delta$  ppm: 143.2, 142.3, 139.8, 137.5, 134.0, 130.6, 128.6, 128.3, 128.3, 128.2, 128.2, 127.6, 127.5, 127.4, 127.1, 126.5.

### Structural data for (1*z*, 3*E*)-**2a** and (1*E*, 3*E*)-**2i**

Crystal structure analysis of (1*z*, 3*E*)-**2a**: (C<sub>16</sub> H<sub>13</sub> Cl<sub>1</sub>); *M* = 240.71. APEXII, Bruker-AXS diffractometer, Mo-K $\alpha$  radiation ( $\lambda$  = 0.71073 Å), *T* = 150(2) K; orthorhombic *P*2<sub>1</sub>2<sub>1</sub>2<sub>1</sub> (I.T.#19), *a* = 5.6950(3), *b* = 7.5345(5), *c* = 28.7029(17) Å, *V* = 1231.61(13) Å<sup>3</sup>, *Z* = 4, *d* = 1.298 g.cm<sup>-3</sup>,  $\mu$  = 0.283 mm<sup>-1</sup>. The structure was solved by direct methods using the *SIR97* program,<sup>5</sup> and then refined with full-matrix least-square methods based on *F*<sup>2</sup> (*SHELXL-97*)<sup>6</sup> with the aid of the *WINGX*<sup>7</sup> program. All non-hydrogen atoms were refined with anisotropic atomic displacement parameters. Except linked hydrogen atoms that were introduced in the structural model through Fourier difference maps analysis, H atoms were finally included in their calculated positions. A final refinement on *F*<sup>2</sup> with 2831 unique intensities and 154 parameters converged at  $\omega R(F^2)$  = 0.0738 (*R*(*F*) = 0.0326) for 2540 observed reflections with *I* > 2 $\sigma$ (*I*).

<sup>4</sup> C. C. Yu, D. K. P. Ng, B.-L. Chen, T.-Y. Luh, *Organometallics*, 1994, **13**, 1487.

<sup>5</sup> A. Altomare, M. C. Burla, M. Camalli, G. Cascarano, C. Giacovazzo, A. Guagliardi, A. G. G. Moliterni, G. Polidori, R. Spagna, *J. Appl. Cryst.*, 1999, **32**, 115.

<sup>6</sup> G.M. Sheldrick, *Acta Cryst. A*64, 2008, 112.

<sup>7</sup> L. J. Farrugia, *J. Appl. Cryst.*, 1999, **32**, 837.



Selected interatomic distances (Å) and angles (°): C6 - C7 = 1.466(2), C7 - C8 = 1.343(2), C8 - C9 = 1.447(2), C9 - C10 = 1.343(2), C10 - C11 = 1.480(2), C5 - C6 - C7 - C8 = 173.96(16), C7 - C8 - C9 - C10 = -175.57(17), C9 - C10 - C11 - C12 = 3.7(2).

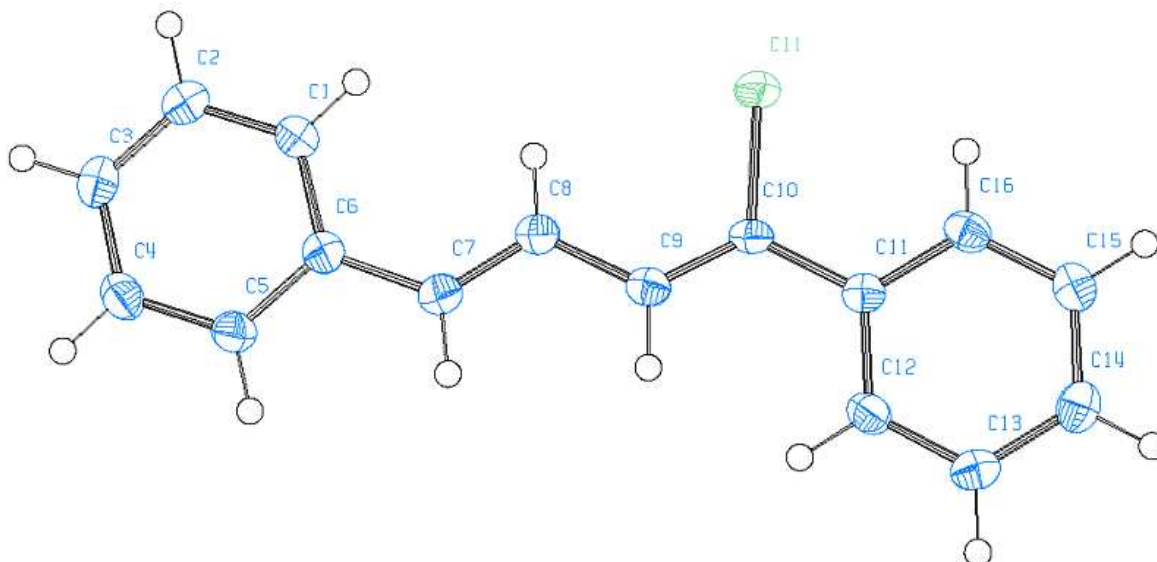

Crystal structure analysis of (1*E*, 3*E*)-**2i**: (C<sub>18</sub> H<sub>11</sub> Cl N<sub>2</sub>); *M* = 290.74. APEXII, Bruker-AXS diffractometer, Mo-K $\alpha$  radiation ( $\lambda$  = 0.71073 Å), *T* = 150(2) K; monoclinic *P*2<sub>1</sub>/*c* (I.T.#14), *a* = 11.0766(6), *b* = 10.0123(6), *c* = 13.7838(7) Å,  $\beta$  = 108.455(2)°, *V* = 1450.04(14) Å<sup>3</sup>, *Z* = 4, *d* = 1.332 g.cm<sup>-3</sup>,  $\mu$  = 0.257 mm<sup>-1</sup>. The structure was solved by direct methods using the *SIR97* program,<sup>5</sup> and then refined with full-matrix least-square methods based on *F*<sup>2</sup> (*SHELXL-97*)<sup>6</sup> with the aid of the *WINGX*<sup>7</sup> program. All non-hydrogen atoms were refined with anisotropic atomic displacement parameters. H atoms were finally included in their calculated positions. A final refinement on *F*<sup>2</sup> with 3304 unique intensities and 190 parameters converged at  $\omega R(F^2)$  = 0.1036 (*R*(*F*) = 0.0473) for 2346 observed reflections with *I* > 2 $\sigma$ (*I*).

Selected interatomic distances (Å) and angles (°): C6 - C9 = 1.479(2), C9 - C21 = 1.347(2), C20 - C21 = 1.445(2), C19 - C20 = 1.346(2), C16 - C19 = 1.458(3), C5 - C6 - C9 - C21 = 36.6(3), C19 - C20 - C21 - C9 = 175.15(18), C15 - C16 - C19 - C20 = -17.8(3).

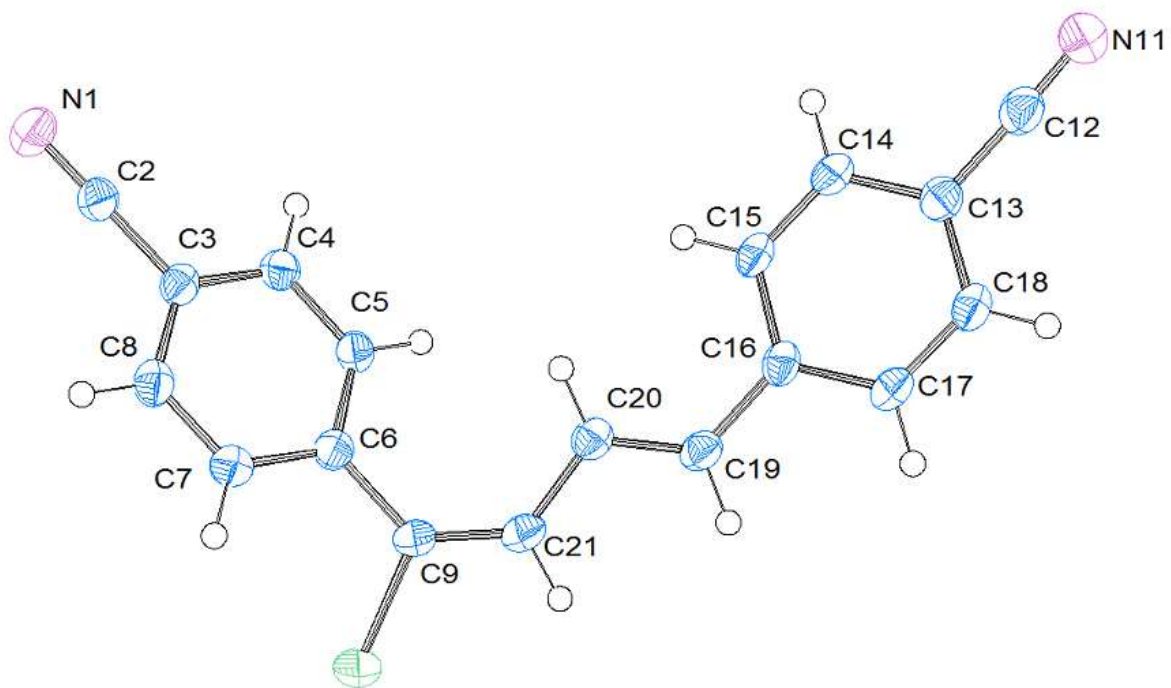

Supplement: c2cc36422k.pdf [file c2cc36422k.pdf]
